# Supplementary material for: Utilisation of eye health services and compliance with spectacles wear among community school adolescents: a mixed-methods study from Bagmati province of Nepal
Source: HighWire-hosted journal article supplement (doi:10.1136/bmjopen-2024-087287), 2024-08-01
Supplement: bmjopen-2024-087287supp001_data_supplement.pdf [file bmjopen-2024-087287supp001_data_supplement.pdf]

Focus Group Discussion Guide

सामूहिक छलफलका लागि निर्देशिका

Focus Group Discussion Details:

- Date:
- Facilitators' Name:
- Participants Codes:

विवरणहरू:

- मिति:
- सहजकर्ताहरूको नाम :
- सहभागीहरूको कोडहरू:

**Objective:** To collect insights on students' experiences and perceptions regarding their use of eye care services.

**उद्देश्य:** आँखा जाँच सेवाहरूको उपयोगका बारेमा विद्यार्थीहरूको अनुभव र धारणाहरू सङ्कलन गर्ने ।

Introduction:

- Welcome participants and explain the purpose of the discussion.
- Introduce yourself and other facilitators.
- Explain about respect for others' opinions, confidentiality, and no right or wrong answers in discussion.
- Obtain verbal/written consent from all participants.

परिचय:

- सहभागीहरूलाई स्वागत गर्नुहोस् र छलफलको उद्देश्य व्याख्या गर्नुहोस् ।
- आफ्नो र सहजकर्ता साथीको परिचय गराउनुहोस् ।
- अरूको रायको सम्मान गर्ने, गोपनीयता को सुनिश्चितता गर्ने र कुनै जवाफहरू सही वा गलत नहुने भन्ने जानकारी दिनुहोस् ।
- सहभागीहरूसँग मौखिक वा लिखित सहमति लिनुहोस् ।

Icebreaker:

- What are your thoughts on the importance of eye care?  
आँखा स्वास्थ्यको महत्त्वबारे तपाईं केहि भन्न चाहानु हुन्छ ?

### Eye care service utilization आँखा जाँच सेवाको उपयोग

- When it comes to getting your eyes checked, where do you typically go?
  - Probe: Eye clinic or Hospital or Wait for Eye Program at Schoolतपाईं सामान्यतया आँखा जाँच गराउन कहाँ जानुहुन्छ ?
  - के तपाईं आँखा क्लिनिक वा आँखा अस्पताल जानुहुन्छ ?
  - कि विद्यालयमा आँखा जाँचको कार्यक्रम कुनै हुन्छ ?
- Could you share why you or your friends to go for an eye check-up?
  - Probe: Problem in vision, headaches, etc.
  - Probe: Teacher, parents influence
  - Probe: Peers supportive role
  - Probe: Subsidies in eye care servicesतपाईं वा तपाईंका साथीहरूलाई आँखाको जाँच गर्न किन जानु भयो ?
  - के दृष्टिमा समस्या भएकोले जानु भयो ?
  - कि टाउको दुख्ने समस्या आँखाको कारणले हो भन्ने बुझेर जानु भयो ?
  - के शिक्षक वा अभिभावकहरूले आँखाको जाँच गर्न जानु पछि भनेर जानु भयो ?
  - यसमा साथीहरूको भूमिका पनि थियो कि ?
  - वा सेवाहरूमा छुट भएकोले जानु भयो ?
- What factors prevented you or your friends from going to eye centers for eyes check-up?
  - Probe: Distance to eye center
  - Probe: School and Family's role
  - Probe: Peers role
  - Probe: Cost of eye check-up, treatment, glasses or travel expenses
  - Probe: Waited for Eye Program at School for Treatment
- तपाईं वा तपाईंका साथीहरू आँखा जाँचका लागि किन आँखा उपचार केन्द्रमा जानु भएन ?
  - आँखा उपचार केन्द्र टाढा भएर ?
  - घरबाट आँखा जाँच गर्नु पर्दैन भनेर ?
  - विद्यालयमा कसैले वास्ता नगरेर ?
  - साथीहरूले नजान्छ भनेर ?
  - आँखाको जाँच, उपचार, चशमा वा यात्रा खर्च नपुग्ला कि भनेर ?
  - विद्यालयमा नै आँखा जाँच कार्यक्रमले उपचार गरिहाल्छ नि भनेर ?
- Reflecting on your school experience, how did screening your visual acuity at schools by your friends impact your approach to seeking eye care services? Please explain.
- तपाईंको विद्यालयमा साथीहरूले गरिदिएको दृष्टि क्षमता जाँचले तपाईंलाई आँखा जाँच गर्न आँखा केन्द्र जानलाई प्रभाव पारेको थियो कि थिएन ? यसको बारेमा केहि भन्न चाहानुहुन्छ ?

Focus Group Discussion Guide

सामूहिक छलफलका लागि निर्देशिका

Focus Group Discussion Details:

- Date:
- Facilitators' Name:
- Participants Codes:

विवरणहरू:

- मिति:
- सहजकर्ताहरूको नाम :
- सहभागीहरूको कोडहरू:

**Objective:** To gather experiences on compliance with spectacles wear among students.

**उद्देश्य:** विद्यार्थीहरूको चश्मा प्रयोगको अनुपालन सम्बन्धि अनुभव र धारणाहरू सङ्कलन गर्ने ।

Introduction:

- Welcome participants and explain the purpose of the discussion.
- Introduce yourself and other facilitators.
- Explain about respect for others' opinions, confidentiality, and no right or wrong answers in discussion.
- Obtain verbal/written consent from all participants.

परिचय:

- सहभागीहरूलाई स्वागत गर्नुहोस् र छलफलको उद्देश्य व्याख्या गर्नुहोस् ।
- आफ्नो र सहजकर्ता साथीको परिचय गराउनुहोस् ।
- अरूको रायको सम्मान गर्ने, गोपनीयताको सुनिश्चितता गर्ने र कुनै जवाफहरू सही वा गलत नहुने भन्ने जानकारी दिनुहोस् ।
- सहभागीहरूसँग मौखिक वा लिखित सहमति लिनुहोस् ।

### Compliance with Spectacles Wear चश्मा प्रयोगको अनुपालन

1. What factors played role in your decision to continue wearing spectacles?
  - Probe: Free or subsidized glasses, aesthetic purpose,
१. के कति कारणहरूले तपाईंले चश्मा लगाई राख्नु भयो ?
  - छुटमा चश्मा पाएर हो कि ?
  - चश्मा तपाईंलाई सुहाएको भएर हो कि ?
2. What factors influenced your decision to discontinue wearing spectacles?
  - Probe: Disliked Frames, Difficulty wearing
२. के कस्ता कारणहरूले तपाईंले चश्मा लगाउन छाड्नु भयो ?
  - चश्माको फ्रेम मन नपरेर हो कि ?
  - चश्मा लगाउन अप्ठ्यारो भएर हो कि ?
3. Could you describe any experiences or challenges you've encountered related to wearing spectacles at school?
३. विद्यालयमा चश्मा लगाउदा तपाईंले भोगेका अनुभव वा चुनौतिहरू हामीलाई बताउन चाहनु हुन्छ ?
4. How do your friends and teachers typically react when they see you wearing spectacles?
  - Probe: Do friends tease you?
४. तपाईंले चश्मा लगाएको देख्दा साथीहरू र शिक्षकहरूले के कस्तो प्रतिक्रिया दिनुभयो ?
  - के साथीहरूले जिस्काएर नलगाउनु भएको हो ?
5. What was the opinion of your parents, family, and neighbour regarding your decision to wear spectacles?
५. तपाईंले चश्मा लगाएको देख्दा तपाईंका आमा बुबा, घर परिवार र छर छिमेकीहरूको के कस्तो धारणा थियो ?
6. Did you ever experience any joys, concerns or discomfort related to wearing spectacles?
६. तपाईंले चश्मा लगाउँदाको राम्रो वा नराम्रो अनुभव हामीलाई बताउन चाहनु हुन्छ ?
