# Supplementary material for: Utilisation of eye health services and compliance with spectacles wear among community school adolescents: a mixed-methods study from Bagmati province of Nepal
Source: HighWire-hosted journal article supplement (doi:10.1136/bmjopen-2024-087287), 2024-08-01
Supplement: bmjopen-2024-087287supp002_data_supplement.pdf [file bmjopen-2024-087287supp002_data_supplement.pdf]

Utilization of eye health services and compliance with spectacles wear among community school adolescents: a mixed methods study from Bagmati province of Nepal

Supplementary Table 1.: Qualitative findings from students about eye care service utilization

| Themes               | Accessibility to eye care facility                                                                                                                                                                                                       | COVID-19 Pandemic                                                                                                                                                                | Awareness of eye health                                                                                                                                                                                                                 |
|----------------------|------------------------------------------------------------------------------------------------------------------------------------------------------------------------------------------------------------------------------------------|----------------------------------------------------------------------------------------------------------------------------------------------------------------------------------|-----------------------------------------------------------------------------------------------------------------------------------------------------------------------------------------------------------------------------------------|
| Verbatim Transcripts | Nearby health facility has no eye care services..... We need to travel to <i>Besi</i> (district headquarter). It takes one full day to go, check-up, and return home. Besides, I must miss my school too. – Participant#7, Female, FGD#2 | My father said the eye clinic was near the hospital with COVID-19 patients. So, we didn’t go. – Participant#2, Male, FGD#1                                                       | I thought I didn't need to examine my eyes... My eyes didn’t pain.... I could walk, play, and study. – Participant#7, Male, FGD#3                                                                                                       |
|                      | If we miss the only bus returning late afternoon, we must stay in headquarters. – Participant#8, Male, FGD#2                                                                                                                             | I had fear of COVID-19 infection... I did not want to travel by bus and go to eye clinic because bus is packed and people were not wearing masks. – Participant#1, Female, FGD#3 | My mother told me that if I wear spectacles, I must wear them for life. She said I must watch mobile phone less and eat more leafy vegetables for healthy eyes..... But, I do not like leafy vegetables. – Participant#4, Female, FGD#3 |
|                      | Despite knowing that I might have issues with my vision, I did not go for a check-up because the eye clinic is too far. – Participant#1, Female, FGD#1                                                                                   | I did not go (to eye clinic) at first as I had symptoms of COVID-19. Later I went for check-up. – Participant#10, Male, FGD#3                                                    | My grandfather had eye surgery last year. I thought they would also operate me if I go to eye hospital... So, I didn’t tell my mother about my poor vision. – Participant#5, Male, FGD#2                                                |
|                      | My brother took me to eye clinic the very next day after referral... The eye clinic is nearby down the lane... It’s about 10 minutes’ walk from our (rented) room. – Participant#3 Male, FGD#1                                           |                                                                                                                                                                                  |                                                                                                                                                                                                                                         |

Utilization of eye health services and compliance with spectacles wear among community school adolescents: a mixed methods study from Bagmati province of Nepal

Supplementary Table 2.: Qualitative findings from students on compliance with spectacles use

| Themes               | Affordability                                                                                                                                                                                      | Symptomatic relief                                                                                                                                                              | Role of Friends, Family, and Teachers                                                                                                                            | Comfortability                                                                                                                                                                           |
|----------------------|----------------------------------------------------------------------------------------------------------------------------------------------------------------------------------------------------|---------------------------------------------------------------------------------------------------------------------------------------------------------------------------------|------------------------------------------------------------------------------------------------------------------------------------------------------------------|------------------------------------------------------------------------------------------------------------------------------------------------------------------------------------------|
| Verbatim Transcripts | One of our friends broke the spectacles while playing. He hasn't been able to replace them... Spectacles are expensive.... So, we don't use spectacles while playing. – Participant#1, Male, FGD#4 | After using spectacles, I can clearly see what is written on the whiteboard which has helped in my study. Hence, I continue to use my spectacles. – Participant#4, Female FGD#5 | Our class teacher encourages us to wear spectacles. She said it will help us see better and improve our studies too. – Participant#1, Male, FGD#6                | It is difficult to wear a mask and spectacles at the same time. We are not allowed inside schools without face masks. I wear a mask, but not spectacles. – Participant#10, Female, FGD#6 |
|                      | My father told me that once we start using spectacles, we need to replace spectacles often. He doesn't have money for that... So, I only wear them during classes. – Participant#3, Female, FGD#5: | Before using spectacles, I had headaches while looking at blackboards. Now, I don't have headaches after wearing spectacles. – Participant#5, Male, FGD#4                       | When I got spectacles from the school, I wore them and went home. My mother said that I should continue using them for my health. – Participant#8, Female, FGD#5 | I didn't like my spectacles. I didn't find it comfortable to wear across my ears and nose. So, I am not wearing them. – Participant#9, Male, FGD#4                                       |

| Themes | Affordability                                                                                                                                          | Symptomatic relief                                                                                                    | Role of Friends, Family, and Teachers                                                                                                                            | Comfortability                                                                                                                                                        |
|--------|--------------------------------------------------------------------------------------------------------------------------------------------------------|-----------------------------------------------------------------------------------------------------------------------|------------------------------------------------------------------------------------------------------------------------------------------------------------------|-----------------------------------------------------------------------------------------------------------------------------------------------------------------------|
|        | I forgot my spectacles at a playground near my hometown. After losing that, my family was unable to buy a new one. – Participant #9, Male, FGD#6       | My vision didn’t improve. I started having headaches, so I stopped wearing spectacles. – Participant#6, Female, FGD#4 | My friends called me by names like Double Battery after I started wearing spectacles. So, I stopped wearing spectacles. – Participant#4, Male, FGD#4             | My friends and family tell me that the spectacles (frame) I am wearing suit my face. I also feel the same and feel good wearing them. – Participant#10, Female, FGD#5 |
|        | When I told my father about subsidies in eye checkup and spectacles, he said he could add money to buy good spectacles. – Participant#4, Female, FGD#5 |                                                                                                                       | Some of my classmates were already wearing spectacles before I started... So, it was easy for me to start wearing spectacles too. – Participant#4, Female, FGD#6 |                                                                                                                                                                       |
